# Supplementary material
Source: publisher figshare collection journal article supplement (https://gsapubs.figshare.com/ndownloader/files/26858867)

This Supplemental Material accompanies Lagain, A., Bouley, S., Baratoux, D., Marmo, C., Costard, F., Delaa, O., Pio Rossi, A., Minin, M., Benedix, G.K., et al., 2021, Mars Crater Database: A participative project for the classification of the morphological characteristics of large Martian craters, *in* Reimold, W.U., and Koeberl, C., eds., Large Meteorite Impacts and Planetary Evolution VI: Geological Society of America Special Paper 550, [https://doi.org/10.1130/2021.2550\(29\)](https://doi.org/10.1130/2021.2550(29)).

## APPENDIX

**Appendix A: Examples of secondary craters contained in the Robbins & Hynek’s database not recognized as secondaries in our survey.** They are all not located into a crater cluster and are far away from a large crater potentially being the source of these craters. The Robbins’ database entries are indicated by a red circle superposed with transparency to THEMIS imagery and MOLA data. a: An 8.89km in diameter entry in the Robbins & Hynek’s database classified as a misidentified crater in our survey. b: This 1.04km crater has been classified as “standard” in our study. c: Chaplet of 9 kilometric craters classified here as misidentified entries. These circular structures are located on the northeast edge of the Tharsis bulge and are clearly formed by the volcanic and tectonic activity.

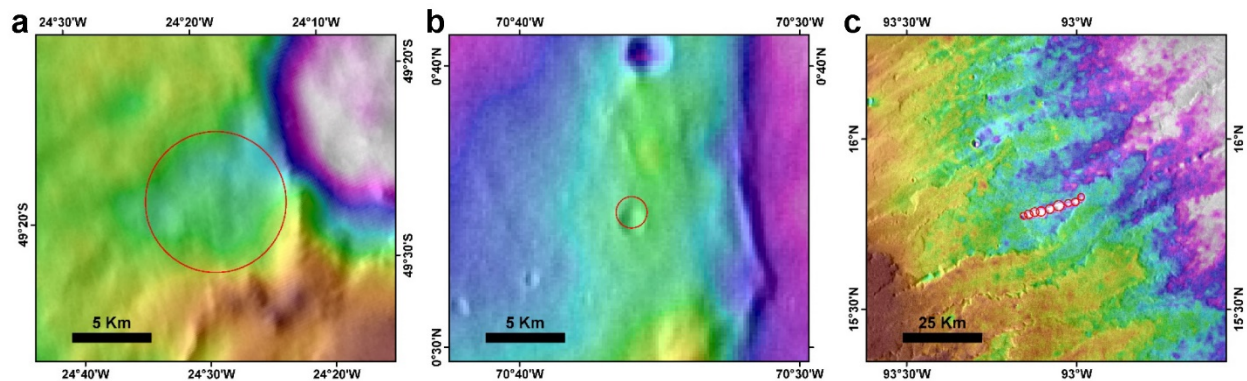

## Appendix B: Database content

- CRATER\_ID: Same as Robbins' database except for craters added for which ID has been built from their location: northern hemisphere = 100-xxx, southern hemisphere = 200-xxx, -xxx corresponds to the order of creation.
- RADIUS: Same as Robbins' database, in meters, except for craters added for which the radius has been determined from three points placed on the crater rim.
- X, Y: Coordinates, same as Robbins' database except for craters added for which it corresponds to the centroid of circle shape created on Cesium.
- TYPE: Crater classification (numerical): 1 = Standard, 2 = Layered Ejecta Rampart Sinuous (LERS) and Low-Aspect Ratio Layered Ejecta (LARLE) crater, 3 = Buried / degraded craters, 4 = Secondary.
- STATUS: Crater classification (text).
- LRD\_MORPH: Ejecta morphology for layered ejecta craters: SLE (Single Layered Ejecta), DLE (Double Layered Ejecta), MLE (Multiple Layered Ejecta), LARLE (Low-Aspect Ratio Layered Ejecta).
- ORIGIN: Secondary craters for which the primary crater source has been identified. The primary CRATER\_ID is indicated. In case of double primary craters being produced secondaries, CRATER\_IDs of the couple is mentioned.
- ADDING: Empty = Craters already contained in the Robbins' database, 1 = Craters added in this study.

## Appendix C: Revision team contribution

| Name                    | Number of quadrangles | Number of craters |
|-------------------------|-----------------------|-------------------|
|                         | reviewed              | reviewed          |
| ANDRIEU François        | 1                     | 1258              |
| BARATOUX David          | 3                     | 9166              |
| BECK Pierre             | 2                     | 5180              |
| BEDOS Bastien           | 2                     | 10876             |
| BEGGIATO Gautier        | ½                     | 2256              |
| BELGACEM Ines           | 2                     | 3123              |
| BOISSON Joséphine       | 1                     | 4985              |
| BOULEY Sylvain          | 2                     | 4436              |
| BOUQUETY Axel           | 3                     | 7973              |
| BOUTARIC Angélique      | ½                     | 1926              |
| CATHELINE Marion        | ½                     | 2231              |
| CHAMPION Jason          | 2                     | 6313              |
| CHANON Clémentine       | ½                     | 1942              |
| CHRISTOFF Nicole        | 1                     | 4134              |
| CIOCCO Marine           | 2                     | 10284             |
| CORMAU Maël             | 2                     | 6743              |
| COSTARD François        | 2                     | 2723              |
| DEHOUCQ Erwin           | 2                     | 5261              |
| DELAGOUTTE Mark-Anthony | ½                     | 1526              |
| DUPEYRAT Laure          | 1                     | 1326              |
| ELBAZ Lazare            | ½                     | 2239              |
| FRANCO Maximilien       | 1                     | 1287              |
| FRIES Morgane           | ½                     | 2231              |
| GAMBLIN Olivier         | ½                     | 1526              |
| GARGANI Julien          | 2                     | 5518              |
| GARRET Emeline          | ½                     | 1767              |
| GEFFRAY Marie-Charlotte | ½                     | 1575              |

|                                  |               |        |
|----------------------------------|---------------|--------|
| <b>GILLET Alexandre</b>          | $\frac{1}{2}$ | 2015   |
| <b>GIRARD Sebastien</b>          | $\frac{1}{2}$ | 2016   |
| <b>GUIMPIER Anthony</b>          | 5             | 16663  |
| <b>JABAUD Benoît</b>             | $\frac{1}{2}$ | 2237   |
| <b>JANEZ Gatien</b>              | $\frac{1}{2}$ | 2256   |
| <b>KARAMOKO Aboubacar</b>        | $\frac{1}{2}$ | 2199   |
| <b>LAGAIN Anthony</b>            | 69            | 155005 |
| <b>LANDAIS François</b>          | 2             | 2920   |
| <b>LAVAUD Pauline</b>            | $\frac{1}{2}$ | 1942   |
| <b>LE CONTE DES FLORIS Elisa</b> | 2             | 6620   |
| <b>LE STUNFF Florent</b>         | $\frac{1}{2}$ | 2199   |
| <b>LEROY Etienne</b>             | $\frac{1}{2}$ | 1767   |
| <b>LOIZEAU Damien</b>            | 3             | 10094  |
| <b>MALAREWICZ Virgile</b>        | $\frac{1}{2}$ | 2387   |
| <b>MARTINOT Mélissa</b>          | 1             | 6051   |
| <b>OURLIAC Camille</b>           | $\frac{1}{2}$ | 2239   |
| <b>PARQUET Loïc</b>              | $\frac{1}{2}$ | 1575   |
| <b>PASQUON Kelly</b>             | 1             | 4229   |
| <b>PAULIEN Nicolas</b>           | 2             | 4671   |
| <b>POTTIER Mathilde</b>          | $\frac{1}{2}$ | 1958   |
| <b>RODIER Jean</b>               | $\frac{1}{2}$ | 2142   |
| <b>ROUSSEAU Batiste</b>          | 1             | 2904   |
| <b>SARIAN Romain</b>             | $\frac{1}{2}$ | 2141   |
| <b>SAVOURAT Marion</b>           | $\frac{1}{2}$ | 1926   |
| <b>SCHMIDT Frédéric</b>          | 1             | 6557   |
| <b>SEJOURNE Antoine</b>          | 3             | 4382   |
| <b>STRAUSS Shani</b>             | $\frac{1}{2}$ | 1958   |
| <b>THOLLOT Patrick</b>           | 2             | 6493   |
| <b>VIALATTE Anne</b>             | 2             | 7489   |
| <b>ZHAO Jinjin</b>               | 2             | 7744   |

**Appendix D: Quadrangles assignment to the crater database reviewing participants.**

Numbers indicated under each name corresponds to the number of craters contained in the Robbins' database within each quadrangle. When several names are indicated, the quadrangle has been subdivided and each reviewer has corrected only one part.

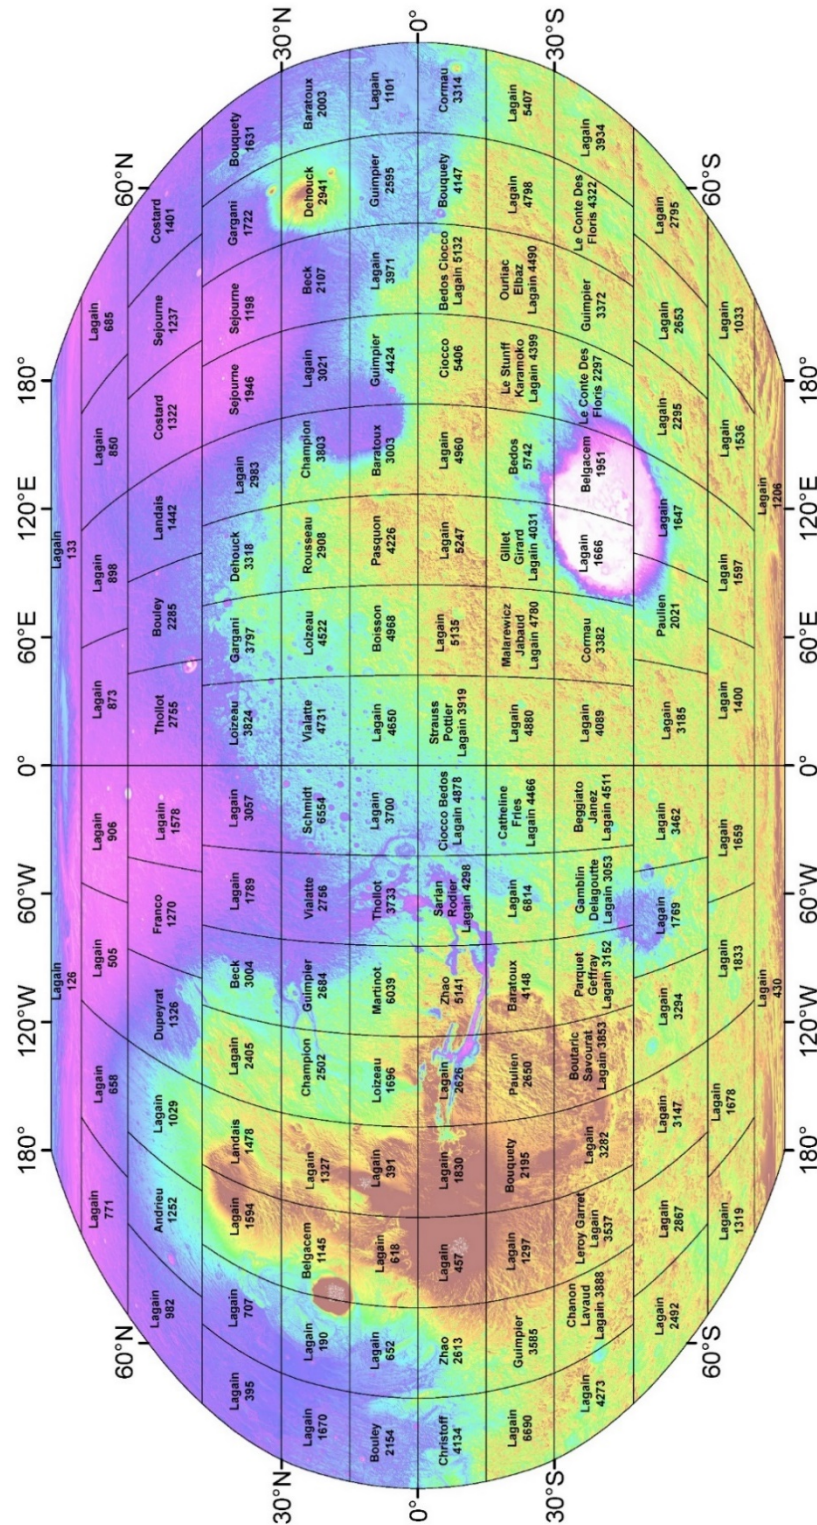

**Appendix E: Three layered ejecta craters for which classification of their ejecta blankets morphology differ between Robbins & Hynek, (2012) and this study.** a: Arandas crater: this layered ejecta crater has been identified as a MLERS in the Robbins' catalog and as a MLERS in this study, in consistency with the detailed geological map published by Lagain et al., (2020a). b: Steinheim crater: Impact crater classified as a DLERS in our survey, mapped and classified by Pietrek et al., (2013) as a double layer ejecta crater. This crater is classified as a MLERS in the Robbins' catalog. c: Unknown crater (-16.091°N, -82.232°W) crater: this crater is classify as a DLERS in the Robbins catalog and as a MLERS in our survey but also in the Barlow & Perez (2003) database.

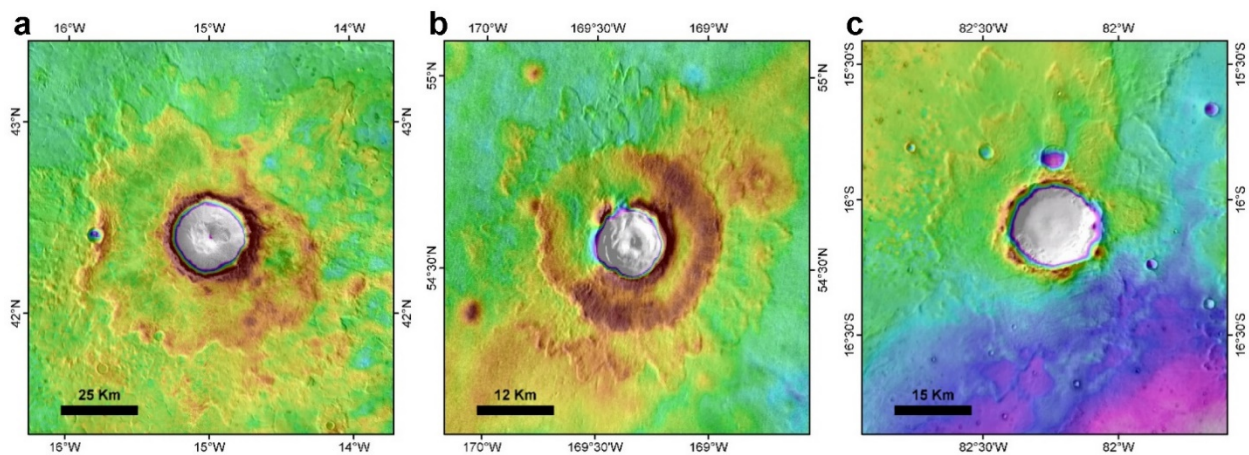



## Appendix F: Examples of misidentified entries contained in the Robbins & Hynek's catalog.

The Robbins' database entries are indicated by a red circle superposed with transparency to THEMIS imagery and MOLA data.

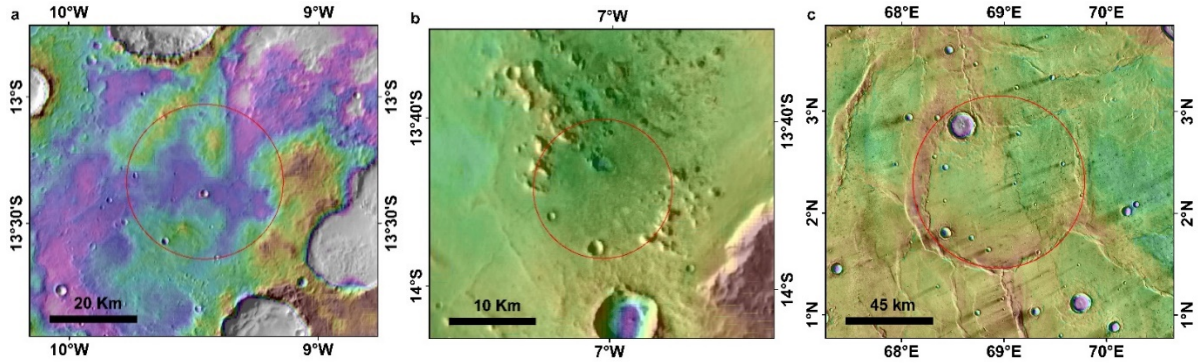

Supplement: Supplementary file 1 [file 26858867]
